# Supplementary material for: Gain‐of‐Function Lrp5 Mutation Improves Bone Mass and Strength and Delays Hyperglycemia in a Mouse Model of Insulin‐Deficient Diabetes
Source: PubMed Central journal article supplement — J Bone Miner Res. 2021 May 5;36(7):1403–15. doi: 10.1002/jbmr.4303 (PMC8360087; doi:10.1002/jbmr.4303), 2021-05-05
Supplement: JBMR-36-1403-s001.pdf [file JBMR-36-1403-s001.pdf]

## Supplementary Methods

**Primary bone marrow stromal cells (BMSC)** were obtained from 10-12 weeks old mice, following previously described procedures <sup>(31,38)</sup>. Briefly, the bone marrow from an entire bone (femur) was flushed with PBS, resuspended in culture media, filtered through 70- $\mu$  filter, and plated in a 15-mm plate. Cells were incubated in growth medium for 2 weeks until 70-80% confluence, then plated in 10mm plates and exposed to insulin 20  $\mu$ g/mL for different times.

## Supplementary Figure Legends

**Supplemental Figure 1. Post-natal Growth and WAT Mass.** (A) Body weight, and (B) length at different ages in the different mutants. N=11-16 at 4 weeks and 4-6 at 18 weeks.  $P>0.05$  by 2-way ANOVA for genotype effect in both measures. (C) Retroperitoneal white adipose tissue (WAT) mass determined post-mortem at 30 weeks of age. Brackets represent adjusted p-values (Tukey's multiple comparison test) after one-way ANOVA, comparing all groups on one side with all groups on the other side.

**Supplemental Figure 2. Bone Microarchitecture in Vivo.** (A) Trabecular thickness, (B) trabecular spacing, (C) cortical bone area, (D) cortical medullary area, (E) trabecular tissue mineral density, and (D) cortical tissue mineral density assessed by in vivo  $\mu$ CT in the 4 genotype groups at 6 and 20 weeks of age. Brackets represent adjusted p-values (Tukey's multiple comparison test) after two-way ANOVA. Brackets on multiple groups (C-F) indicate pairwise comparison of each genotype group at 6 and 20 weeks. Pairwise comparisons with  $p>0.10$  are not indicated.

**Supplemental Figure 3. Bone Microarchitecture Post-Mortem.** (A) Volumetric trabecular bone volume/total volume (BV/TV), (B) trabecular bone mineral density, (C) cortical thickness, and (D) cortical bone area in the 4 genotype groups at 30 weeks of age measured by  $\mu$ CT. Brackets represent adjusted p-values (Tukey's multiple comparison test) after one-way ANOVA..

**Supplemental Figure 4. Intraperitoneal Glucose Tolerance Test and Serum Osteocalcin.** (A) Blood glucose before and after an intraperitoneal glucose load (1.5 mg/kg) at age 10-12 weeks (n=7-10). \*p=0.0192 for WT vs. *Lrp5*<sup>A214V/A214V</sup>; two-way ANOVA and Bonferroni post-hoc test. (B) Serum Gla13 (carboxylated) osteocalcin in \*\*\*-week-old mice. F=1.257, p=0.312 (ANOVA).

**Supplemental Figure 5. Insulin Signaling.** (A, B) Two replicates of immunoblots of whole cell lysates from external ear-derived adipocyte cultures before and after 5 or 30 minutes of exposure to 1  $\mu$ g/ml of insulin. Quantitative band densitometry is shown in Fig. 8. (C) Immunoblot of bone marrow stromal cell lysates before and after 5 or 30 minutes of exposure to 20  $\mu$ g/ml of insulin.

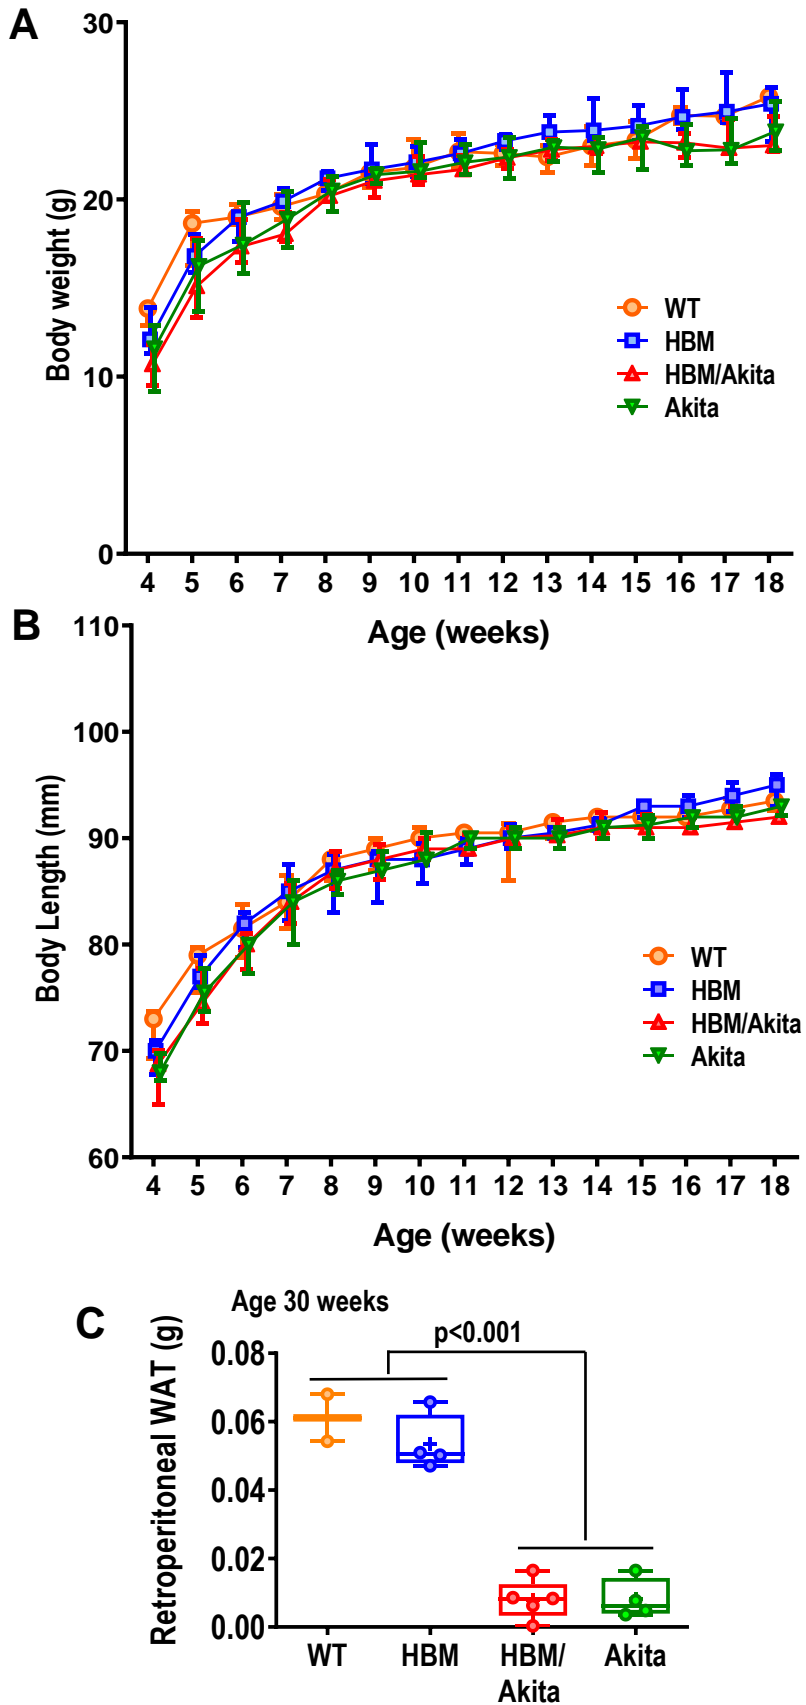

Supplemental Figure 1

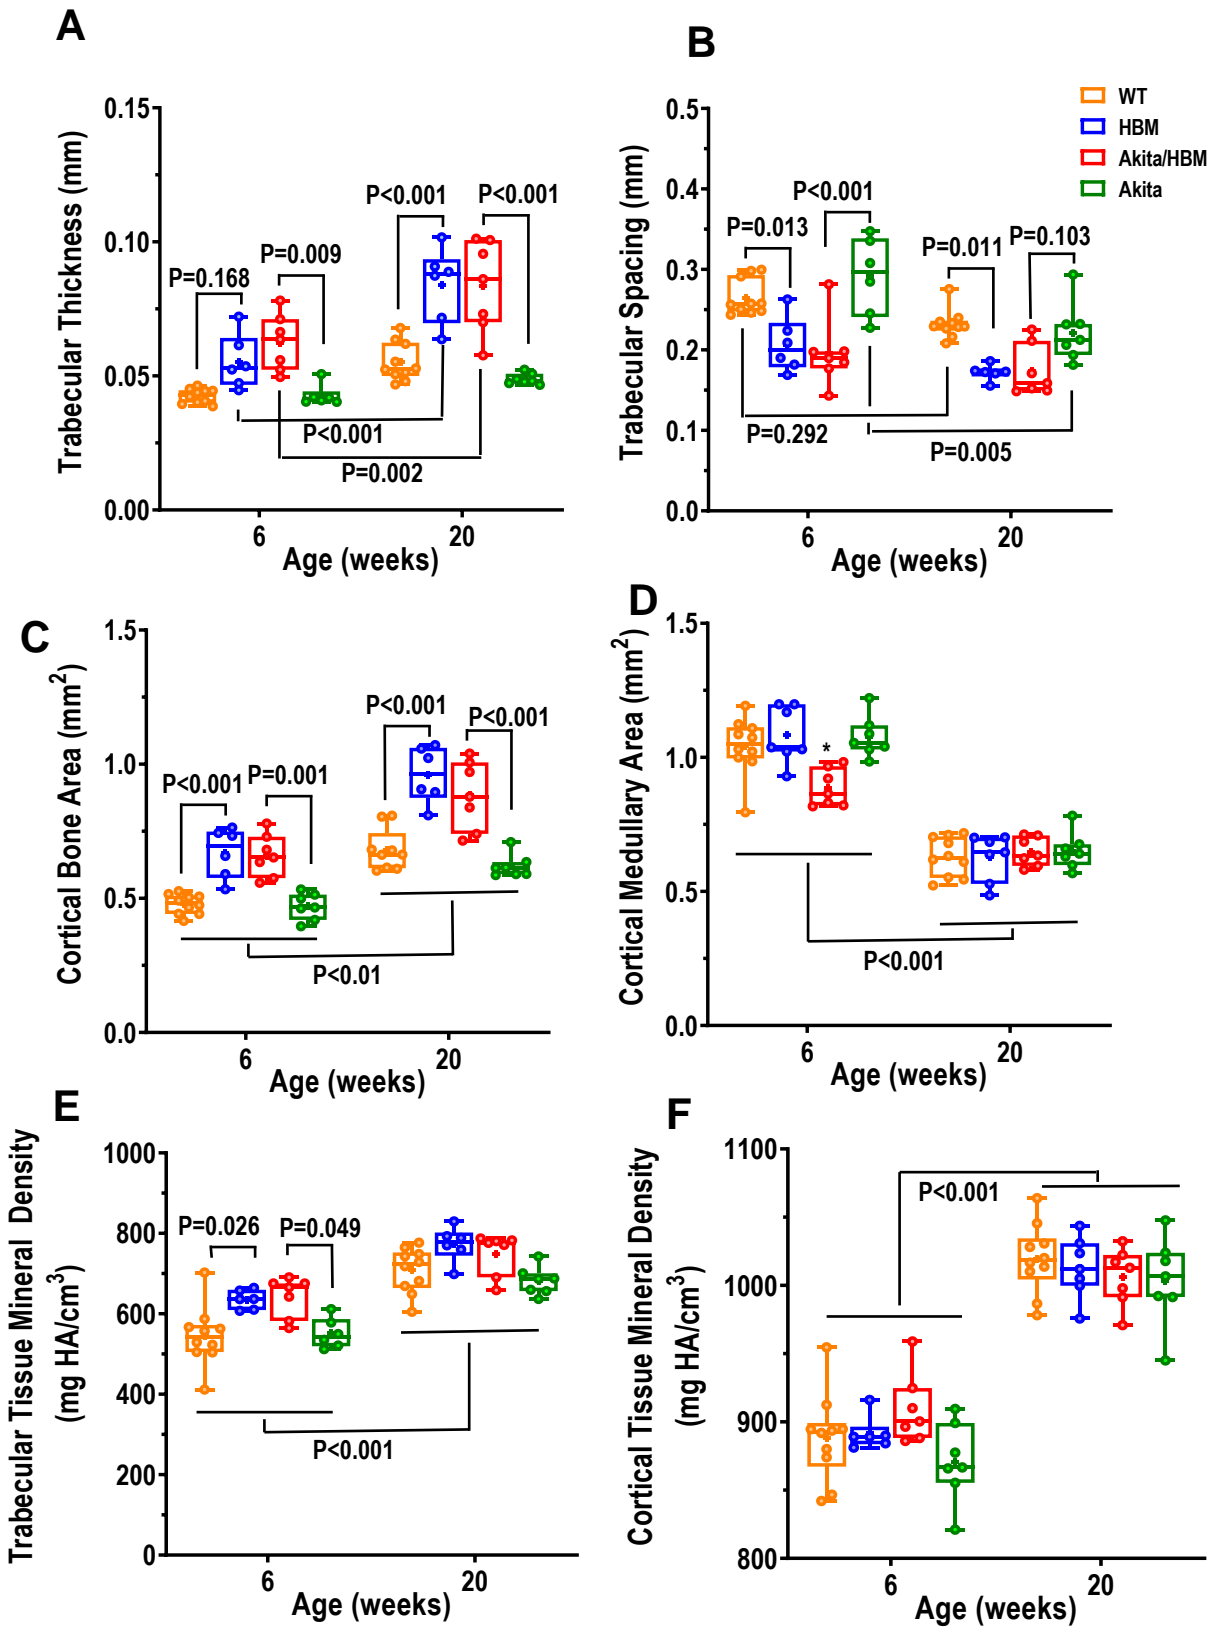

Supplemental Figure 2

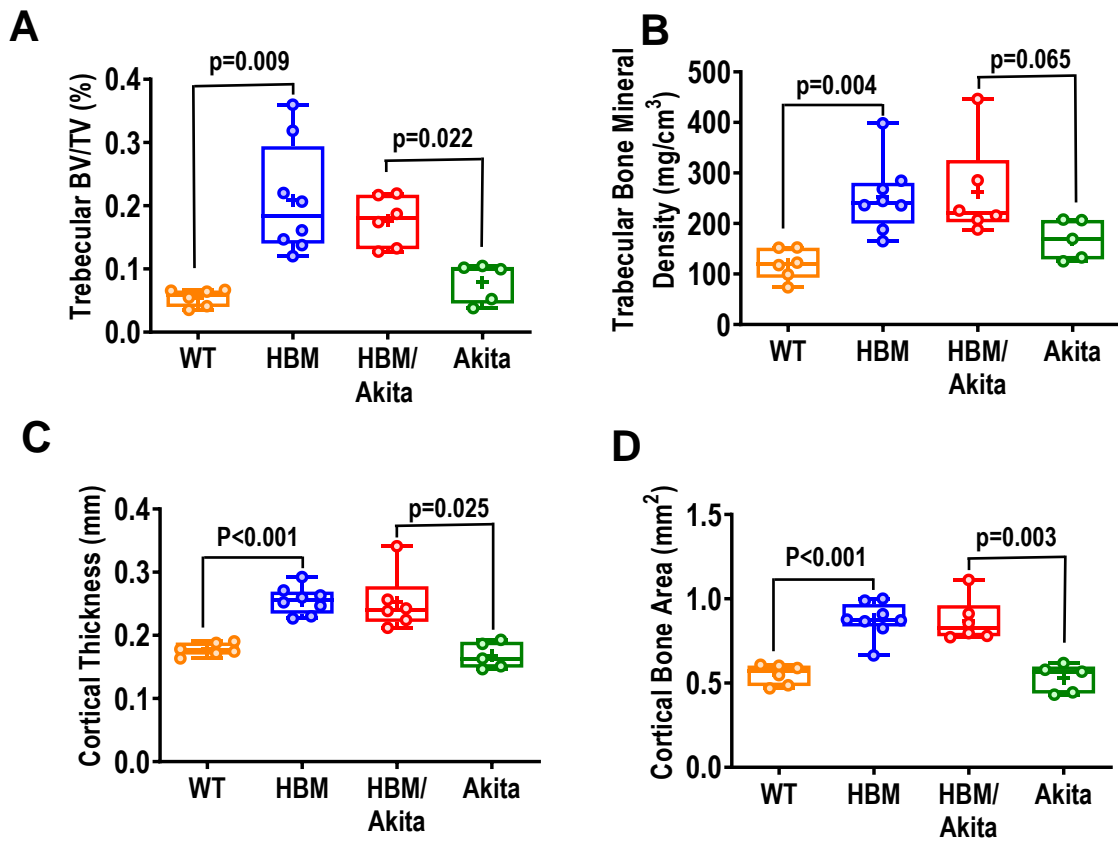

Supplemental Figure 3

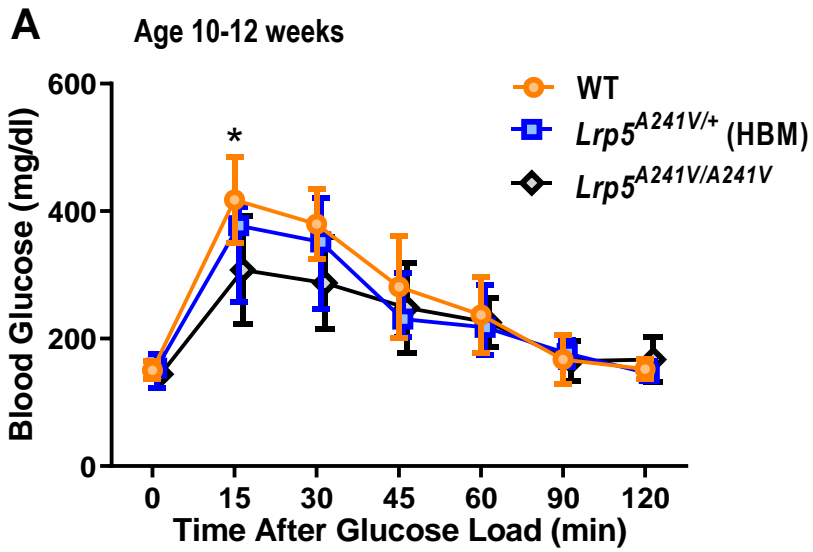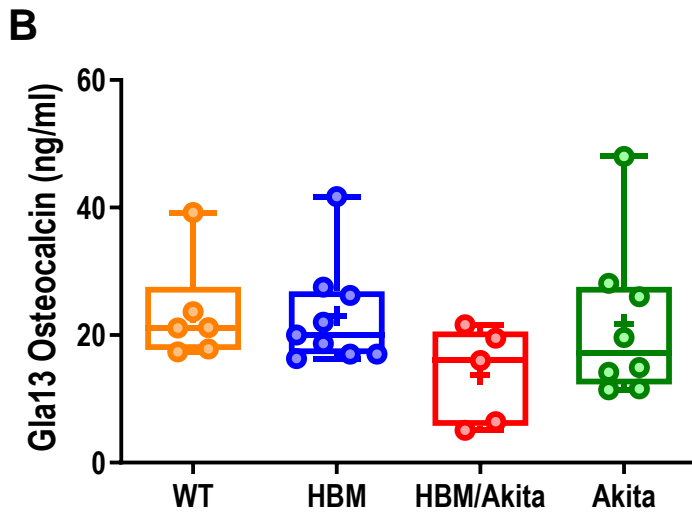

Supplemental Figure 4

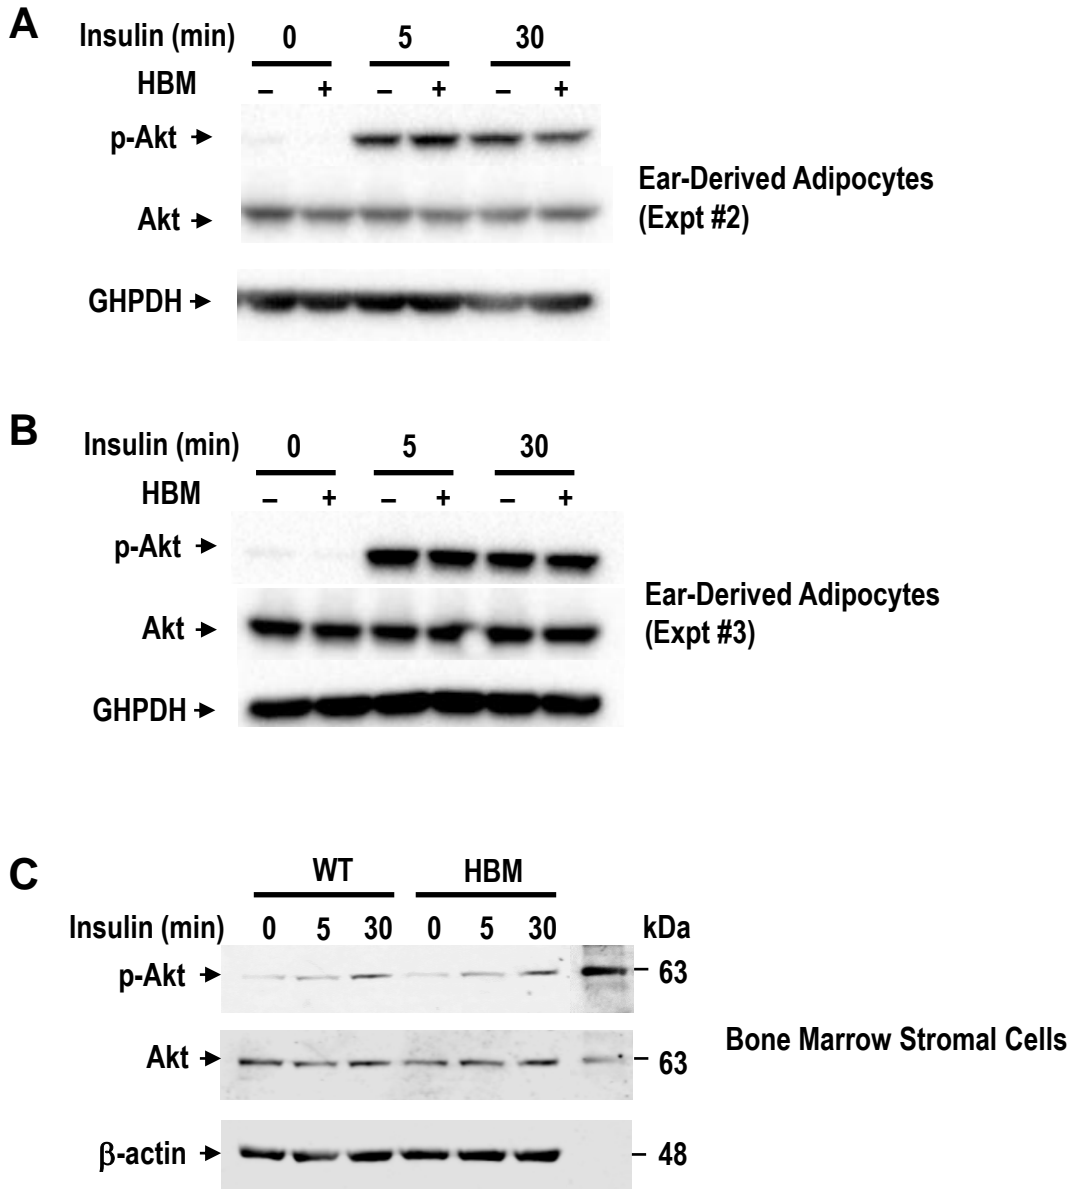

Supplemental Figure 5
