# Supplementary material for: Gain‐of‐Function Lrp5 Mutation Improves Bone Mass and Strength and Delays Hyperglycemia in a Mouse Model of Insulin‐Deficient Diabetes
Source: PubMed Central journal article supplement — J Bone Miner Res. 2021 May 5;36(7):1403–15. doi: 10.1002/jbmr.4303 (PMC8360087; doi:10.1002/jbmr.4303), 2021-05-05
Supplement: JBMR-36-1403-s002.pdf [file JBMR-36-1403-s002.pdf]

## Full unedited gels for Fig. 8B and Supplemental Fig. 4A, B

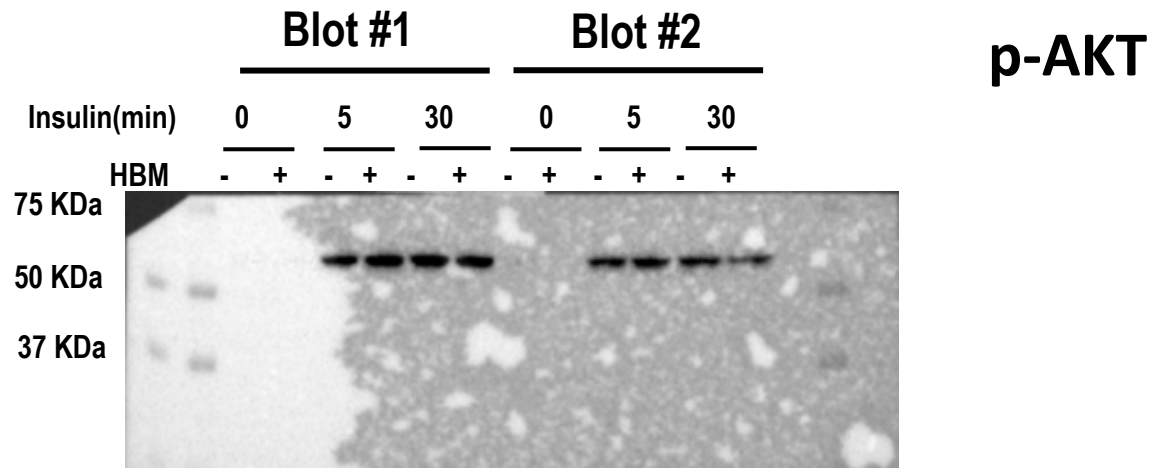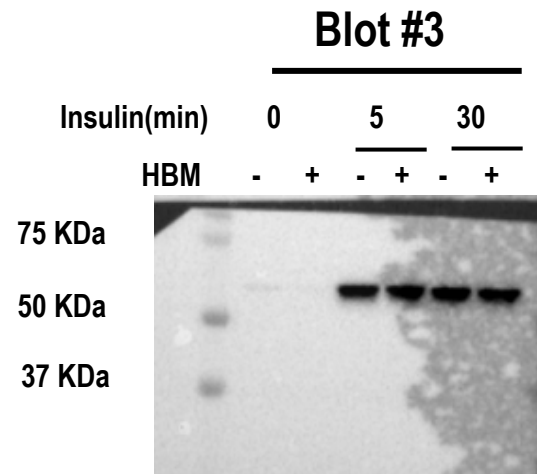

### Full unedited gels for Fig. 8B and Supplemental Fig. 4A, B

1  
2  
3  
4  
5  
6  
7  
8  
9  
10  
11  
12  
13  
14  
15  
16  
17  
18  
19  
20  
21  
22  
23  
24  
25  
26  
27  
28  
29  
30  
31  
32  
33  
34  
35  
36  
37  
38  
39  
40  
41

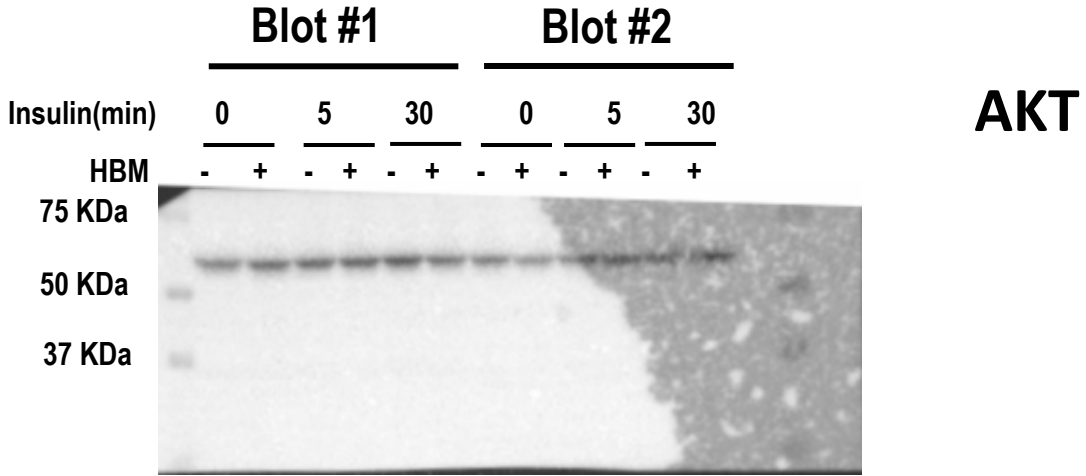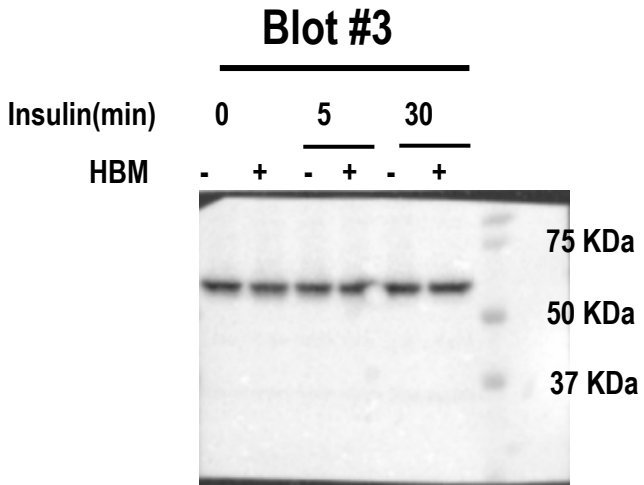

## Full unedited gels for Fig. 8B and Supplemental Fig. 4A, B

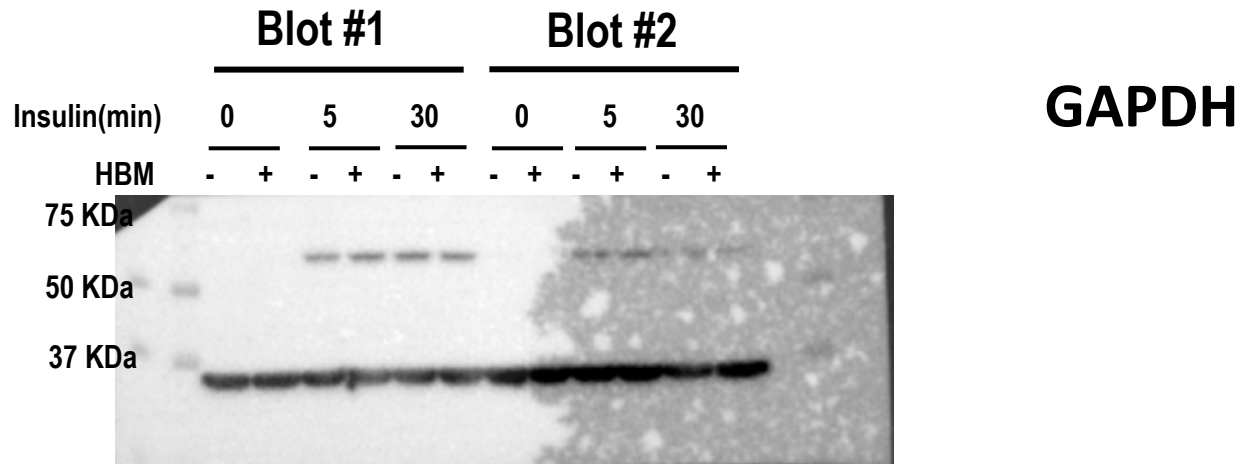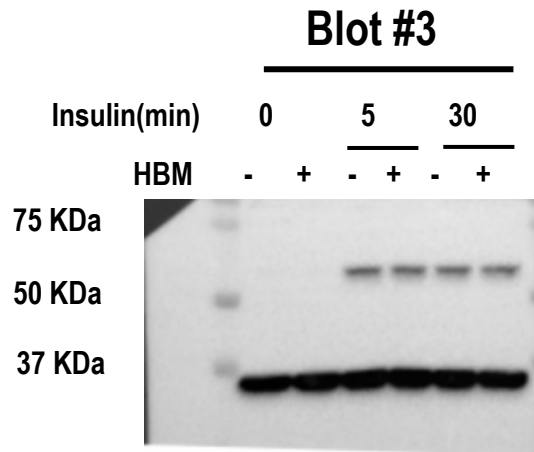

1  
2  
3  
4  
5  
6  
7  
8  
9  
10  
11  
12  
13  
14  
15  
16  
17  
18  
19  
20  
21  
22  
23  
24  
25  
26  
27  
28  
29  
30  
31  
32  
33  
34  
35  
36  
37  
38  
39  
40  
41

### Full unedited gels for Supplemental Fig. 4C

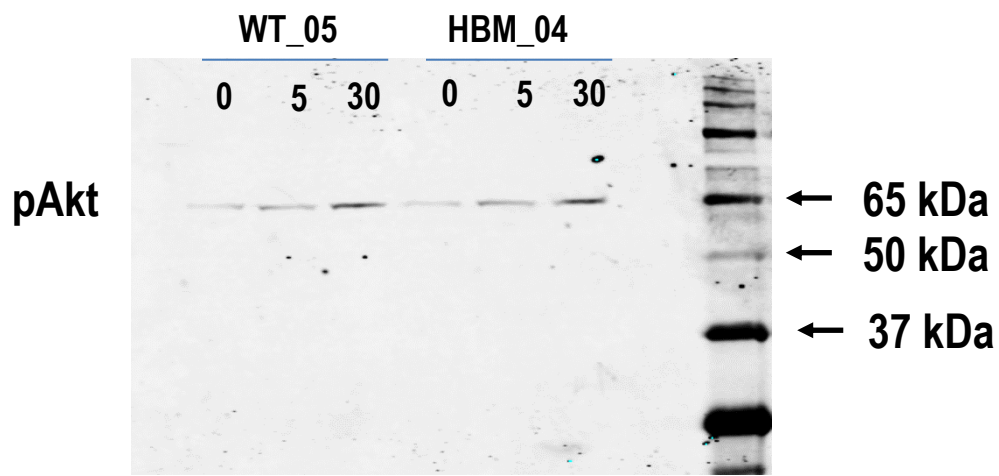

### Akt

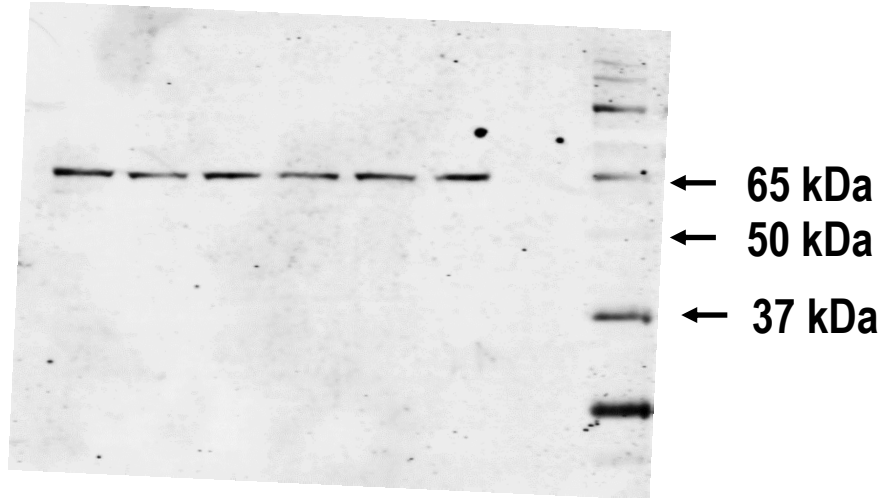

### Actin

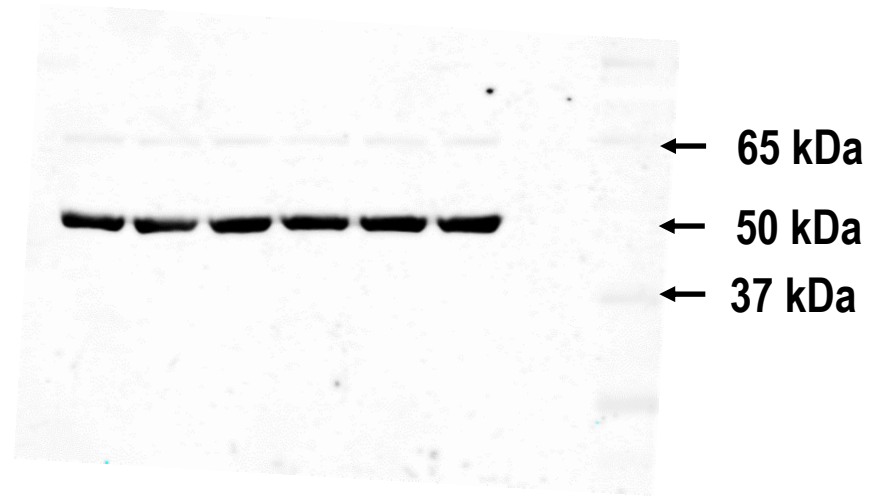

1  
2  
3  
4  
5  
6  
7  
8  
9  
10  
11  
12  
13  
14  
15  
16  
17  
18  
19  
20  
21  
22  
23  
24  
25  
26  
27  
28  
29  
30  
31  
32  
33  
34  
35  
36  
37  
38  
39  
40  
41
